# Supplementary material for: Childhood Maltreatment and Adult Work Absenteeism: Work Meaningfulness as a Double-Edged Sword
Source: MDPI journal article supplement (doi:10.3390/ijerph21040451), 2024-04-07
Supplement: s1 [file s1]

# **Child maltreatment and adult work absenteeism: work meaningfulness as a double-edged sword**

**Table S1 - Demographic Characteristics of Participants**

|                            | Maltreated employees |       | Non-maltreated employees |       | Full sample |       |
|----------------------------|----------------------|-------|--------------------------|-------|-------------|-------|
|                            | <i>n</i>             | %     | <i>n</i>                 | %     | <i>n</i>    | %     |
| <b>Gender</b>              |                      |       |                          |       |             |       |
| Female                     | 107                  | 93%   | 185                      | 88.9% | 292         | 90.4% |
| Male                       | 8                    | 7%    | 23                       | 11.1% | 31          | 9.6%  |
| <b>Marital Status</b>      |                      |       |                          |       |             |       |
| Single                     | 21                   | 18.4% | 41                       | 19.7% | 62          | 19.2% |
| Married/partnered          | 82                   | 71.9% | 154                      | 74%   | 236         | 73.1% |
| Divorced/separated         | 8                    | 7%    | 12                       | 5.8%  | 20          | 6.2%  |
| Widowed                    | 3                    | 2.6%  | 1                        | .5%   | 4           | 1.2%  |
| Missing                    | -                    | -     | -                        | -     | 1           | 0.3%  |
| <b>County of Birth</b>     |                      |       |                          |       |             |       |
| Israel                     | 98                   | 85.2% | 184                      | 88.5% | 282         | 87.3% |
| Former Soviet Union        | 8                    | 7%    | 11                       | 5.3%  | 19          | 5.9%  |
| Ethiopia                   | 3                    | 2.6%  | 4                        | 1.9%  | 7           | 2.2%  |
| Other                      | 6                    | 5.2%  | 9                        | 4.3%  | 15          | 4.6%  |
| <b>Religion</b>            |                      |       |                          |       |             |       |
| Judaism                    | 104                  | 90.4% | 187                      | 90.3% | 291         | 90.1% |
| Christianity               | 1                    | 0.9%  | 6                        | 2.9%  | 7           | 2.2%  |
| Islam                      | 9                    | 7.8%  | 12                       | 5.8%  | 21          | 6.5%  |
| Other                      | 1                    | 0.9%  | 2                        | 1%    | 3           | 0.9%  |
| Missing                    | -                    | -     | -                        | -     | 1           | 0.3%  |
| <b>Income</b>              |                      |       |                          |       |             |       |
| Below average              | 70                   | 63.1% | 124                      | 59.3% | 195         | 61.5% |
| Average                    | 22                   | 19.8% | 50                       | 23.9% | 68          | 21.5% |
| Above average              | 19                   | 17.1% | 35                       | 16.8% | 54          | 17%   |
| Missing                    | -                    | -     | -                        | -     | 6           | 1.9%  |
| <b>Managerial position</b> |                      |       |                          |       |             |       |
| Yes                        | 25                   | 22.1% | 46                       | 22.9% | 71          | 22.6% |
| No                         | 88                   | 77.9% | 155                      | 77.1% | 243         | 77.4% |
| Missing                    |                      |       |                          |       | 9           | -     |

**Table S2 - Demographic and Work-related Characteristics of Participants**

|                                      | Maltreated employees |           | Non-maltreated employees |           | Full sample |           | Sample size (N) |
|--------------------------------------|----------------------|-----------|--------------------------|-----------|-------------|-----------|-----------------|
|                                      | <i>Mean</i>          | <i>SD</i> | <i>Mean</i>              | <i>SD</i> | <i>Mean</i> | <i>SD</i> |                 |
| <b>Age</b>                           | 39.35                | 10.45     | 40.07                    | 10.13     | 39.82       | 10.24     | 314             |
| <b>Years of Education</b>            | 16.78                | 2.58      | 17.03                    | 2.20      | 16.94       | 2.34      | 317             |
| <b>Working hours (per week)</b>      | 36.53                | 9.07      | 37.38                    | 11.28     | 37.08       | 10.54     | 310             |
| <b>Years at current role</b>         | 5.74                 | 6.7       | 7.14                     | 7.81      | 6.64        | 7.54      | 284             |
| <b>Years at current organization</b> | 6.34                 | 7.33      | 7.11                     | 7.51      | 6.84        | 7.45      | 267             |

**Figure S1 – Frequency of absent days from work (last 3 months)**

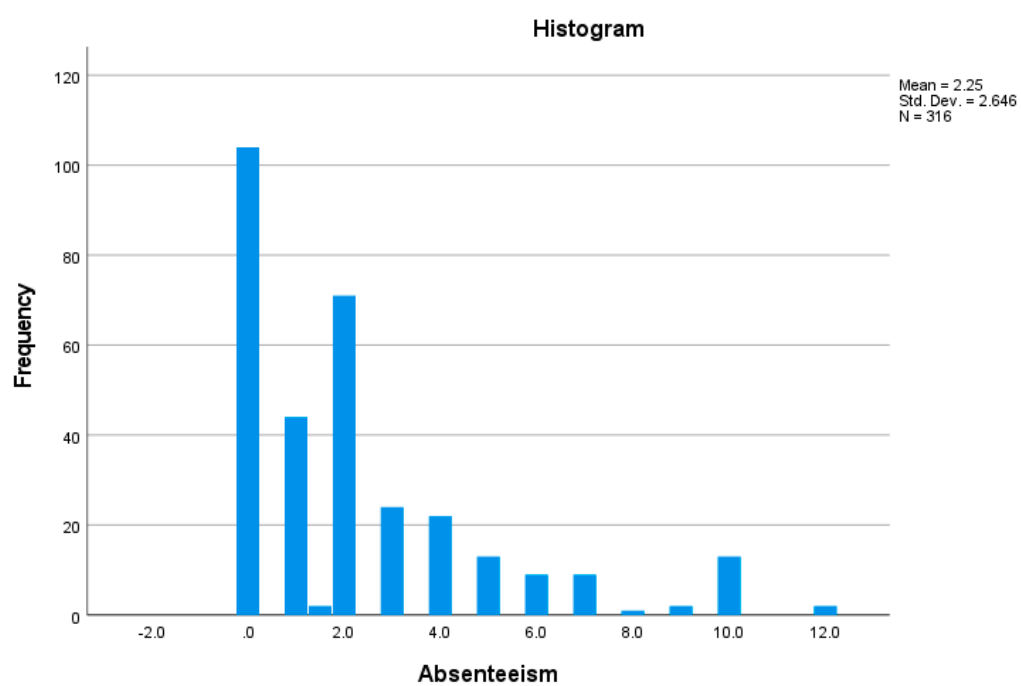

**Table S3 - Prevalence of Childhood Exposure to Abuse and Neglect by Category (Full Sample - Maltreated and Non-maltreated Employees)**

| <b>Category of maltreatment childhood exposure</b> | <b>Prevalence (%)</b> |
|----------------------------------------------------|-----------------------|
| <b>Abuse by category</b>                           |                       |
| Psychological                                      | 22.0%                 |
| Physical                                           | 13.4%                 |
| Sexual                                             | 11.8%                 |
| <b>Neglect by category</b>                         |                       |
| Emotional                                          | 15.6%                 |
| Physical                                           | 3.1%                  |
| <b>Witnessing domestic violence</b>                | 5.4%                  |
| <b>Any category reported</b>                       | 34.7%                 |
